# Supplementary material
Source: publisher site journal article supplement (https://www.dovepress.com/get_supplementary_file.php?f=219699b.docx)
Supplement: Supplementary file 1 [file get_supplementary_file.php]

| **17525108** | **23990866** | **17406027** | **25655581** | **25550556** | **11238304** | **11857020** | **26383518** | **22605983** | **18801625** | **25109507** | **24217791** | **23378342** | **16211285** | **10446991** | **12527944** | **10778975** | **17649779** | **15843204** | **11331451** | **27701415** | **27503579** | **16736329** | **10719724** | **Acceptable(*)** | **Quality assessment**  **criteria** |
| --- | --- | --- | --- | --- | --- | --- | --- | --- | --- | --- | --- | --- | --- | --- | --- | --- | --- | --- | --- | --- | --- | --- | --- | --- | --- |
| ***Selection*** | | | | | | | | | | | | | | | | | | | | | | | | | |
| * | * | * | * | * | * | * | * | * | * | * | * | * | * |  | * | * | * | * | * | * | * | * | * | Yes, with independent validation | **Is the case definition adequate?** |
| * | * | * | * | * | * | * | * | * |  | * | * | * | * | * | * | * | * | * | * | * | * | * | * | Consecutive or obviously representative  series of cases | **Representativeness of cases?** |
|  |  |  |  |  |  |  |  |  |  |  |  |  |  |  |  |  |  |  |  |  |  |  |  | Community controls | **Selection of controls?** |
| * |  | * | * | * | * | * | * | * | * | * | * | * | * |  | * | * | * | * | * |  | * | * | * | No history of CRC | **Definition of controls?** |
| ***Comparability*** | | | | | | | | | | | | | | | | | | | | | | | | | |
| * | * | * | * | * |  |  | * | * | * | * | * | * | * | * | * | * | * | * | * | * | * | * | * | Yes(age, Sex and or TNM / Dukes Staging system) | **Study controls for (age or stage)?** |
|  |  | * | * | * |  |  | * | * |  | * |  | * | * | * | * |  | * |  | * | * | * | * | * | pathology reports, CT scan, Therapy (Chemo/ Radio therapy or surgery ), Recurrance, Patient Follow up, Multi-target faecal DNA test, Colonoscopy, Sigmoidoscopy, The origion of cancer (cecum/ colon/ sigmoid/ rectum), time of sampling ( before or after surgery ), the blood volume. | **Study controls for at least 3**  **additional factors** |
|  |  |  | ***Exposure*** | | | | | | | | | | | | | | | | | | | | | | |
| * | * | * | * | * | * | * | * | * | * | * | * | * | * | * | * | * | * | * | * | * | * | * | * | Secure record, Structured interview by healthcare practitioner, blind to  case/control status | **Ascertainment of exposure?** |
| * | * | * | * | * | * | * | * | * | * | * | * | * | * | * | * | * | * | * | * | * | * | * | * | Yes | **Same method of ascertain-ment of cases/controls?** |
|  |  |  |  |  |  |  |  |  |  |  |  |  |  |  |  |  |  |  |  |  |  |  |  | Same for both groups | **Non-response rate?** |
| 6 | 5 | 7 | 7 | 7 | 5 | 5 | 7 | 7 | 5 | 7 | 6 | 7 | 7 | 5 | 6 | 6 | 7 | 6 | 7 | 6 | 7 | 7 | 7 |  | **Total Ratio** |
| **Overall Quality Score (Maximum = 9)** | | | | | | | | | | | | | | | | | | | | | | | | | |

| **11889075** | **11121864** | **12420218** | **11289125** | **10.6051/j.issn.2224-3992.2012.01.070** | **10642939** | **9823981** | **9014772** | **15490093** | **17058136** | **15637763** | **16048578** | **12032226** | **9242433** | **29058262** | **18097410** | **diagnosis** | **31304099** | **25631749** | **30578762** | **21732137** | **23150200** | **25909322** | **21422427** | **Acceptable(*)** | **Quality assessment**  **criteria** |
| --- | --- | --- | --- | --- | --- | --- | --- | --- | --- | --- | --- | --- | --- | --- | --- | --- | --- | --- | --- | --- | --- | --- | --- | --- | --- |
| ***Selection*** | | | | | | | | | | | | | | | | | | | | | | | | | |
| * | * | * | * | * | * | * | * | * | * | * | * | * | * | * | * |  | * | * | * |  | * | * |  | Yes, with independent validation | **Is the case definition adequate?** |
| * | * | * | * | * | * | * | * | * | * | * | * | * | * | * | * |  | * | * | * | * | * | * | * | Consecutive or obviously representative  series of cases | **Representativeness of cases?** |
|  |  |  |  |  |  |  |  |  |  |  |  |  |  |  |  |  |  |  |  |  |  |  |  | Community controls | **Selection of controls?** |
| * | * | * | * | * | * | * | * | * |  | * | * | * | * |  |  |  |  | * | * |  | * | * |  | No history of CRC | **Definition of controls?** |
| ***Comparability*** | | | | | | | | | | | | | | | | | | | | | | | | | |
| * | * |  | * | * | * | * |  | * | * | * | * | * | * | * | * |  | * | * | * | * | * | * | * | Yes(age, Sex and or TNM / Dukes Staging system) | **Study controls for (age or stage)?** |
| * | * |  | * | * |  | * | * | * | * |  |  |  |  |  |  |  | * | * | * | * | * |  | * | pathology reports, CT scan, Therapy (Chemo/ Radio therapy or surgery ), Recurrance, Patient Follow up, Multi-target faecal DNA test, Colonoscopy, Sigmoidoscopy, The origion of cancer (cecum/ colon/ sigmoid/ rectum), time of sampling ( before or after surgery ), the blood volume. | **Study controls for at least 3**  **additional factors** |
|  |  |  |  | ***Exposure*** | | | | | | | | | | | | | | | | | | | | | |
| * | * | * | * | * | * | * | * | * | * | * | * | * | * | * | * |  | * | * | * | * | * | * | * | Secure record, Structured interview by healthcare practitioner, blind to  case/control status | **Ascertainment of exposure?** |
|  | * | * | * | * | * | * | * | * | * | * | * | * | * | * | * |  | * | * | * | * | * | * | * | Yes | **Same method of ascertain-ment of cases/controls?** |
|  |  |  |  |  |  |  |  |  |  |  |  |  |  |  |  |  |  |  |  |  |  |  |  | Same for both groups | **Non-response rate?** |
| 6 | 7 | 5 | 7 | 7 | 7 | 7 | 6 | 7 | 6 | 6 | 6 | 6 | 6 | 5 | 5 |  | 6 | 7 | 7 | 6 | 7 | 6 | 5 |  | **Total Ratio** |
| **Overall Quality Score (Maximum = 9)** | | | | | | | | | | | | | | | | | | | | | | | | | |

|  |  | **24752533** | **26993598** | **22304365** | | **22811761** | | **15355922** | | **28618931** | | **28362321** | | **18936523** | | **10.1016/j.ejmhg.2009.10.001** | | **24922677** | | **18949363** | | **20596680** | | **17054783** | | **16391796** | | **15375555** | | **15192312** | | **11410499** | | **11579116** | | **10.1046/j.1365-2168.1997.02685** | | **8797868** | | **21573768** | | **26808060** | | **16945168** | | **Acceptable(*)** | **Quality assessment**  **criteria** |
| --- | --- | --- | --- | --- | --- | --- | --- | --- | --- | --- | --- | --- | --- | --- | --- | --- | --- | --- | --- | --- | --- | --- | --- | --- | --- | --- | --- | --- | --- | --- | --- | --- | --- | --- | --- | --- | --- | --- | --- | --- | --- | --- | --- | --- | --- | --- | --- |
| ***Selection*** | | | | | | | | | | | | | | | | | | | | | | | | | | | | | | | | | | | | | | | | | | | | | | | |
|  |  | * | * | * | | * | | * | | * | | * | | * | | * | | * | | * | | * | | * | | * | | * | | * | | * | | * | | * | | * | | * | | * | | * | | Yes, with independent validation | **Is the case definition adequate?** |
|  |  | * | * | * | | * | | * | | * | | * | | * | | * | | * | | * | |  | |  | | * | | * | | * | | * | | * | | * | | * | | * | |  | | * | | Consecutive or obviously representative  series of cases | **Representativeness of cases?** |
|  |  |  |  |  | |  | |  | |  | |  | |  | |  | |  | |  | |  | |  | |  | |  | |  | |  | |  | |  | |  | |  | |  | |  | | Community controls | **Selection of controls?** |
|  |  |  |  | * | | * | | * | |  | |  | | * | | * | | * | | * | | * | | * | | * | | * | | * | | * | | * | | * | | * | | * | | * | |  | | No history of CRC | **Definition of controls?** |
| ***Comparability*** | | | | | | | | | | | | | | | | | | | | | | | | | | | | | | | | | | | | | | | | | | | | | | | |
|  |  | * | * | | * | | * | | * | * | | * | | * | | * | | * | | * | | * | | * | | * | | * | | * | | * | | * | | * | | * | | * | | * | | * | | Yes(age, Sex and or TNM / Dukes Staging system) | **Study controls for (age or stage)?** |
|  |  | * | * | | * | |  | |  | * | | * | |  | |  | | * | | * | | * | | * | | * | |  | | * | | * | |  | | * | |  | | * | |  | | * | | pathology reports, CT scan, Therapy (Chemo/ Radio therapy or surgery ), Recurrance, Patient Follow up, Multi-target faecal DNA test, Colonoscopy, Sigmoidoscopy, The origion of cancer (cecum/ colon/ sigmoid/ rectum), time of sampling ( before or after surgery ), the blood volume. | **Study controls for at least 3**  **additional factors** |
| ***Exposure*** | | | | | | | | | | | | | | | | | | | | | | | | | | | | | | | | | | | | | | | | | | | | | | | |
|  |  | * | * | | * | | * | | * | | * | | * | | * | | * | | * | | * | | * | | * | | * | | * | | * | | * | | * | | * | |  | | * | | * | | * | Secure record, Structured interview by healthcare practitioner, blind to  case/control status | **Ascertainment of exposure?** |
|  |  | * | * | | * | | * | | * | | * | | * | | * | | * | | * | | * | | * | | * | | * | | * | | * | | * | | * | | * | | * | | * | | * | | * | Yes | **Same method of ascertain-ment ofcases/controls?** |
|  |  |  |  | |  | |  | |  | |  | |  | |  | |  | |  | |  | |  | |  | |  | |  | |  | |  | |  | |  | |  | |  | |  | |  | Same for both groups | **Non-response rate?** |
|  |  | 6 | 7 | | 7 | | 6 | | 6 | | 6 | | 7 | | 7 | | 6 | | 7 | | 7 | | 6 | | 6 | | 7 | | 6 | | 7 | | 7 | | 6 | | 7 | | 5 | | 7 | | 5 | | 6 |  | **Total Ratio** |
| **Overall Quality Score (Maximum = 9)** | | | | | | | | | | | | | | | | | | | | | | | | | | | | | | | | | | | | | | | | | | | | | | | |

|  |  |  |  |  |  | **29535834** | **30364132** | **30078189** | **29491222** | **10.21037/tcr.2018.05.32** | **27917441** | **28233416** | **27197301** | **27917920** | **22285593** | **22420032** | **22895844** | **26060090** | **24067531** | **27150162** | **Acceptable(*)** | **Quality assessment**  **criteria** |
| --- | --- | --- | --- | --- | --- | --- | --- | --- | --- | --- | --- | --- | --- | --- | --- | --- | --- | --- | --- | --- | --- | --- |
| ***Selection*** | | | | | | | | | | | | | | | | | | | | | | |
|  |  |  |  |  |  | * | * | * | * | * | * | * | * | * | * | * | * | * | * | * | Yes, with independent validation | **Is the case definition adequate?** |
|  |  |  |  |  |  | * | * | * | * | * | * | * | * | * | * | * | * | * | * | * | Consecutive or obviously representative  series of cases | **Representativeness of cases?** |
|  |  |  |  |  |  |  |  |  |  |  |  |  |  |  |  |  |  |  |  |  | Community controls | **Selection of controls?** |
|  |  |  |  |  |  | * |  | * |  | * |  | * | * | * |  | * | * | * | * | * | No history of CRC (patients)/ as negative control (cell lines) | **Definition of controls?** |
| ***Comparability*** | | | | | | | | | | | | | | | | | | | | | | |
|  |  |  |  |  |  | * | * | * | * | * | * | * | * | * | * | * | * | * | * | * | Yes(age and Sex) | **Study controls for (age or stage)?** |
|  |  |  |  |  |  | * | * | * | * |  | * |  | * | * | * | * | * | * | * |  | TNM / Dukes Staging system pathology reports, CT scan, Therapy (Chemo/ Radio therapy or surgery ), Recurrance, Patient Follow up, Multi-target faecal DNA test, Colonoscopy, Sigmoidoscopy, The origion of cancer (cecum/ colon/ sigmoid/ rectum), time of sampling ( before or after surgery ), the blood volume/ the tissue characterization/ cell lines. | **Study controls for at least 3**  **additional factors** |
| ***Exposure*** | | | | | | | | | | | | | | | | | | | | | | |
|  |  |  |  |  |  | * | * | * | * | * | * | * | * | * | * | * | * | * | * | * | Secure record, Structured interview by healthcare practitioner, blind to  case/control status | **Ascertainment of exposure?** |
|  |  |  |  |  |  | * | * | * |  | * |  | * | * | * |  | * | * | * | * | * | Yes | **Same method of ascertain-ment of cases/controls?** |
|  |  |  |  |  |  |  |  |  |  |  |  |  |  |  |  |  |  |  |  |  | Same for both groups | **Non-response rate?** |
|  |  |  |  |  |  | 7 | 6 | 7 | 5 | 6 | 5 | 6 | 7 | 7 | 5 | 7 | 7 | 7 | 7 | 6 |  | **Total Ratio** |
|  |  |  | **Overall Quality Score (Maximum = 9)** | | | | | | | | | | | | | | | | | | | |

**Table S2.** Newcastle-Ottawa scale for assessment of quality of included studies - Case-control studies (each asterisk represents if individual criterion within the subsection was fulfilled)
